# Supplementary material for: The rheumatoid arthritis shared epitope increases cellular susceptibility to oxidative stress by antagonizing an adenosine-mediated anti-oxidative pathway
Source: PubMed Central journal article supplement (PMC1865041; doi:10.1186/ar2111), 2007-01-25
Supplement: ar2111-S2.pdf [file ar2111-S2.pdf]

## Supplemental Figure 2

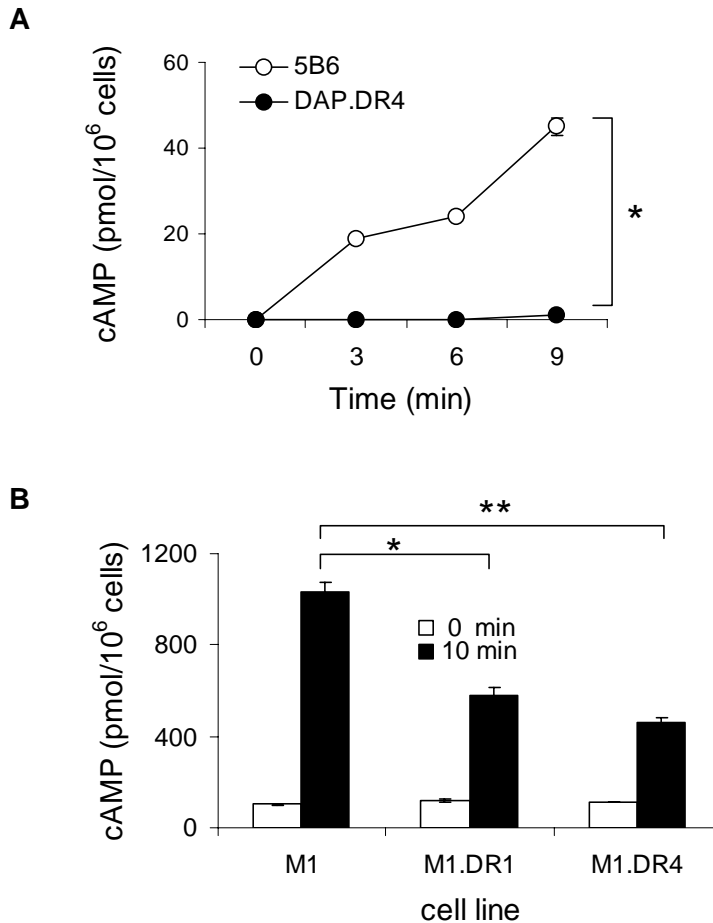

**Supplemental Figure 2. A**, cAMP levels in L cell transfectants were measured at different times following stimulation with 25  $\mu$ M forskolin. As can be seen, 5B6 cells (L cells transfected with a vector containing the DR $\alpha$  sequence only, which does not allow surface expression of the DR molecule) had an intact cAMP response, while DAP.DR4 (L cell transfected with a vector encoding both the DR $\alpha$  and DR $\beta^*0401$  sequences) showed no response. \*,  $p < 0.05$ . **B**. Untransfected M1 cells (M1), M1 cell transfectants expressing on their surface the DR $\beta^*0101$  (M1.DR1), or the DR $\beta^*0401$  (M1.DR4) molecules were stimulated for 10 min with 25  $\mu$ M forskolin and cAMP levels were measured. As can be seen, the SE-positive M1.DR1 and M1.DR4 lines had a markedly blunted cAMP response. \*,  $p < 0.05$ ; \*\*,  $p < 0.01$ .
